# Supplementary material for: Comparative Studies on Duplicated foxl2 Paralogs in Spotted Knifejaw Oplegnathus punctatus Show Functional Diversification
Source: MDPI journal article supplement (doi:10.3390/genes14101847), 2023-09-23
Supplement: s1 [file s1]

| SPECIES                       | FOXL1          | FOXL2                | FOXL2I               | FOXL3          |
|-------------------------------|----------------|----------------------|----------------------|----------------|
| <i>Oplegnathus punctatus</i>  |                | OP123570.1           | OP123571.1           |                |
| <i>Lates calcarifer</i>       | XM_018704013.1 | XM_018684117.1       | XM_018665867.1       | XM_018687806.1 |
| <i>Oreochromis niloticus</i>  | XM_005449217.4 | NM_001279778.1       | XM_005478201.4       | XM_003438562.5 |
| <i>Maylandia zebra</i>        |                | XM_004562801.2       | XM_004554201.1       |                |
| <i>Poecilia formosa</i>       | XM_007567539.2 | XM_007555965.2       | XM_007577326.2       | XM_007542632.2 |
| <i>Takifugu rubripes</i>      |                | XM_003968745.3       | XM_003963226.3       |                |
| <i>Tetraodon nigroviridis</i> |                | ENSTNIT00000017555.1 | ENSTNIT00000018443.1 |                |
| <i>Gadus morhua</i>           |                | XM_030337297.1       | XM_030358894.1       |                |
| <i>Oryzias latipes</i>        | NM_001122919.2 | NM_001104888.1       | XM_004070665.4       | XM_011487873.3 |
| <i>Lepisosteus oculatus</i>   | XM_015367956.1 | XM_006637595.2       | XM_015337030.1       | XM_006637364.2 |
| <i>Danio rerio</i>            | NM_200984.1    | XM_021481464.1       | NM_001128810.1       |                |
|                               |                | NM_001317761.1       |                      |                |
| <i>Astatotilapia burtoni</i>  |                | NW_024582455.1       | NW_024582370.1       |                |
| <i>Dicentrarchus labrax</i>   |                | KF208536.1           | JQ772483.2           |                |
|                               |                | ENSTNIG00000014321   | ENSTNIG00000012897   |                |
| <i>Oncorhynchus mykiss</i>    |                | XM_021581496.2       | NM_001124484.1       |                |

---

|                               |                |                |                |                |
|-------------------------------|----------------|----------------|----------------|----------------|
| <i>Gasterosteus aculeatus</i> |                | XM_040191291.1 | XM_040194533.1 |                |
| <i>Callorhinchus milii</i>    | XM_007889238.2 | XM_007888129.2 | XM_007902179.2 |                |
| <i>Geotrypetes seraphini</i>  | XM_033941309.1 | XM_033959394.1 | XM_033922419.1 | XM_033962914.1 |
| <i>Chelonoidis abingdonii</i> | XM_032793811.1 | XM_032801425.1 | XM_032775521.1 | XM_032771021.1 |
| <i>Chiroxiphia lanceolata</i> | XM_032701484.1 | XM_032697658.1 | XM_032703837.1 | XM_032711676.1 |
| <i>Homo sapiens</i>           | NM_005250.3    | NM_023067.4    |                | NM_001374838.1 |

---
