# Supplementary material for: Comparative Studies on Duplicated foxl2 Paralogs in Spotted Knifejaw Oplegnathus punctatus Show Functional Diversification
Source: MDPI journal article supplement (doi:10.3390/genes14101847), 2023-09-23
Supplement: s1 [file s1]

| Primers        | Sequences                                       |
|----------------|-------------------------------------------------|
| FOXL2-qpcr-FW  | GAGAGCTGATTCCTGTGATT                            |
| FOXL2-qpcr-RV  | TGTGTCCTGATGACTTCTTTAC                          |
| FOXL2l-qpcr-FW | GACTCAAAGTTCATCTGTTTCAC                         |
| FOXL2l-qpcr-RV | AGTACCGACAATAATTCCTTGG                          |
| FOXL2-ISH-FW   | ATTAGGTGACACTATAGAAGGGGGGAACACTACAG<br>GAGACG   |
| FOXL2-ISH-RV   | TAATACGACTCACTATAGGGAGAGAGCAAGCGAA<br>CTGAAG    |
| FOXL2l-ISH-FW  | ATTAGGTGACACTATAGAAGGGTTCCACCACTCT<br>CCTTAC    |
| FOXL2l-ISH-RV  | TAATACGACTCACTATAGGGAGAGAACTGTAGCC<br>TATCAGAAC |
