# Supplementary material for: Comparative Studies on Duplicated foxl2 Paralogs in Spotted Knifejaw Oplegnathus punctatus Show Functional Diversification
Source: MDPI journal article supplement (doi:10.3390/genes14101847), 2023-09-23
Supplement: s1 [file s1]

| Gene name     | Basemean_testis (FPKM) | Basemean_ovary (FPKM) | Foldchange | Log2FC | P value |
|---------------|------------------------|-----------------------|------------|--------|---------|
| <i>foxl2</i>  | 3.68                   | 138                   | 37.47      | 5.23   | 3.02E-6 |
| <i>foxl2l</i> | 303.14                 | 156.82                | 0.52       | -0.95  | 0.38    |
