# Supplementary material for: Comparative Studies on Duplicated foxl2 Paralogs in Spotted Knifejaw Oplegnathus punctatus Show Functional Diversification
Source: MDPI journal article supplement (doi:10.3390/genes14101847), 2023-09-23
Supplement: s1 [file s1]

Oni\_foxl2 MATYQNPEDDAMALMIHDTNTTKEKERPK----EEPVDQKVSEKPDPS-----QKPPYSYVALIAMAIRESSEKRLTTLSGIYQYI  
Opu\_foxl2 MATYQNPEDDAMALMIHDTNTTKEKERPK----EEPVDQKVPEKPDPS-----QKPPYSYVALIAMAIRESSEKRLTTLSGIYQYI  
Ola\_foxl2 MATYQSPEDDPMALMIHDTNTSKDKERPK----EEPVQEKVSEKPDPS-----QKPPYSYVALIAMAIRESSEKRLTTLSGIYQYI  
Gac\_foxl2 MATYQNPEDDAMTLMIHDSNAAKEKERPK----EEPVQEKVPEKADPS-----QKPPYSYVALIAMAIRESSEKRLTTLSGIYQYI  
Omy\_foxl2 MDTYQNPEDDAMALMVHDTNMAKDKERPK----EEPVQEKVSEKTDPS-----QKPPYSYVALIAMAIRESSEKRLTTLSGIYQYI  
Gmo\_foxl2 MAAYQNPEDDAMTLMVHDTNTSKEKERPK----EEPVQEKISEKTDPS-----QKPPYSYVALIAMAIRESSEKRLTTLSGIYQYI  
Oni\_foxl2l MDAEEKSPGGQGAQILDIG-SNS-----PPCEPKGAQEL-----EKPPYSYVALIAMAIKDSSENKRQTLSGIYQYI  
Opu\_foxl2l MDAEEKSPADGGVQLLDIS-SNS-----PPPEPTGAEETGQP-----EKPPYSYVALIAMAIKDGQGKRQTLGGIYDYI  
Gac\_foxl2l MDAQLNPPAGQGLRLLDTV-ASSSSSSSD----PPPSEAEGEEENSQR-----GKPPYSYVALIAMAIKDSRDKRQTLGGIYDYI  
Ola\_foxl2l MDAEEKPIGERGVQLLDIS-STP-----EEAPPL-----EKPPYSYVALIAMAIKDSRDQRKTLGGIYQYI  
Gmo\_foxl2l MD-EGKTTGDQGAGLLDVG-TMWTKAEGEGCSLVPLETGADVAQDHLL-----DKPPYSYVALIAMAIKESSEKRLTTLGIYQYI  
Omy\_foxl2l MD-KEDIHGEQQLDILDLTSSSGMAKSKGSADSADSAAEGVDETDKARVGQTEKPPYSYVALIAMAIKESREKRLTTLGIYQFI

FH domain

\*

Oni\_foxl2 ITKFPFYEKNKKGWQNSIRHNLSLNECFIKVPREGGGERKGNWTLDPACEDMFEKGNRRRRRMKRPFRPPPTHFQPGKA--LF  
Opu\_foxl2 ISKFPFYEKNKKGWQNSIRHNLSLNECFIKVPREGGGERKGNWTLDPACEDMFEKGNRRRRRMKRPFRPPPTHFQPGKS--LF  
Ola\_foxl2 ISKFPFYEKNKKGWQNSIRHNLSLNECFIKVPREGGGERKGNWTLDPACEDMFEKGNRRRRRMKRPFRPPPTHFQPGKA--LF  
Gac\_foxl2 ITKFPFYEKNKKGWQNSIRHNLSLNECFIKVPREGGGERKGNWTLDAACEDMFEKGNRRRRRMKRPFRPPPTHFQPGKS--LF  
Omy\_foxl2 ITKFPFYEKNKKGWQNSIRHNLSLNECFIKVPREGGGERKGNWTLDPACEDMFEKGNRRRRRMKRPFRPPPTHFQPGKS--LF  
Gmo\_foxl2 ISKFPFYEKNKKGWQNSIRHNLSLNECFIKVPREGGGERKGNWTLDPACEDMFEKGNRRRRRMKRPYRPPPTHFQPGKS--LF  
Oni\_foxl2l VSKFPYYERNKKGWQNSIRHNLSLNECFVVKVPRDSGGDRKGNWMLDPAFKDMFEKGNRRRRRVRRPYRPPSVPYLGGNP-VEY  
Opu\_foxl2l ISKFPYYEKNKKGWQNSIRHNLSLNECFVVKVPRENGGDRKGNWMLDPAFEDMFEKGNRRRRRVRRPYRPPSVPYLTGNP-VDY  
Gac\_foxl2l VSKFPYYEKNKKGWQNSIRHNLSLNECFVVKMPRDCAGDRKGNWTLDPAFEDMFDKGNRRRRRVRRPYGPPCVPCPPGNP-VDY  
Ola\_foxl2l ISKFPYYEKNKKGWQNSIRHNLSLNECFVVKVPRENGGDKKGNFWMLDPAFEDMFEKGNRRRRRVRRTYRPPSAPCTTGNP-VEY  
Gmo\_foxl2l IDKFPFYEKNKKGWQNSIRHNLSLNECFVVKIPRENRGDGKGSFWIVDPAFEDMFECGNFRRRKRVRRPFRAPGLPYLPGPS-VDY  
Omy\_foxl2l ISKFPYYEKNKKGWQNSIRHNLSLNECFVVKVPREGGGDRKGNFWTLDPAFENMFEKGNRRRRRVRRPYRPA TVPYIAGTTCVDY

Oni\_foxl2 GGDSYGYLSPPPKYLQSS---FMNNSWSLGGQPPTPMSYTSCQMASGNVSPVNVKGLSAPSSYNPYSRVQSMALPSMVNSYNGMS-H  
Opu\_foxl2 GGDGYGYLSPPPKYLQSS---FMNNSWSLGGQPPTPMSYTSCQMASGNVSPVNVKGLSAPSSYNPYSRVQSMALPSMVNSYNGMS-H  
Ola\_foxl2 GGDGYGYLSPPPKYLQSS---FMNNSWSLGGQPPTPMSYTSCQMASGNVSPVNVKGLTAPSSYNPYSRVQSMALPGMVNSYNGMG-H  
Gac\_foxl2 GGDGYGYLPPPKYLQSS---FMNNSWSLGGQPAPMPYTSCQMGGGNVSPVNVKGLSAPSSYNPYSRVQSMALPGMVNSYNGMG-H  
Omy\_foxl2 GGDGYGYLSPPPKYLQSS---FMNNSWSLGGQPPTPMSYTSCQMASGNVSPVNVKGLSAPSSYNPYSRVQSMGLPSMVNSYNGMS-H  
Gmo\_foxl2 GGDGYGYLSPPPKYLQSS---FMNNSWSLGGQPPTPMSYTSCQMASGNVSPVNVKGLSAPSSYNPYSRVQSMALPGMVNSYNGMSHH  
Oni\_foxl2l SESLY--LQP-----YVSSSWVSCQPGSTQPT---GYPSAPVITGHSRSVSPGTSMTSYCT----PPPHFHHPHYGAYHR  
Opu\_foxl2l PEPLY--LQP-----YVSSSWGLCQPSSSQPT---AYPTPQVITGHTRSVSP-SPVSSYC----PPPHFHHSPYGAYHG  
Gac\_foxl2l PEPLY--LQP-----YVSGSWGLSQPS-----GYPTPHVIPGHRASPGGPMTPYC----SPAHFQHPPYGAYHR  
Ola\_foxl2l PEPLYHYLQPA-----YMTNSWSLCA PGSSPQT---AYPAPQVVSPPQPRSLSPSGPFY-----PPHFFQHAVYGGHHR  
Gmo\_foxl2l NEPLYVHALPEKHVYMQSAQYVSGSWALCHPGSAPQTT-GGYGSTSLINGHARCISPNGFTAGTMGGY-YTPGHF-HPPLGA-HR  
Omy\_foxl2l PEHFYLLQKQPVYVQAP---FVSNPWTL SQPN SPQATS-YSYPQSQPINGQVHSVSPNGYASSPVT---YYHNHQFHATYSAYHR

Oni\_foxl2 HHH---PHHTQQLSPATAAPPP-VSSSNG--AGLQFACSRQPAELSMHCSYWEHETKHSALHTRIDI  
Opu\_foxl2 HHHPAHPHHAQQLSPATAAPPP-VSSSNG--AGLQFACSRQPAELSMHCSYWEHETKHSALHTRIDI  
Ola\_foxl2 HHHPAHPHHAQQLSPATAAPPP-VSSSNG--AGLQFACSRQPAELSMHCSYWEHETKHSALHTRIDI  
Gac\_foxl2 HHHPAHPHHSQQLSPATAAPPP-VSSGNG--AGLQFACSRQPAELSMHCSYWEHETKHSALHTRIDI  
Omy\_foxl2 HHHHP-HAHHHAQQLNPATVAPPP-VSSSNG--AGLQFACSRQPTELSMMHCSYWDHESKHSALHARIDI  
Gmo\_foxl2 HHHHAHSHHPQQLSPAAAAPPPPVPSNNGAAAGLQFACSRQPAELSMHCSYWEHESKHSALHTRIDI  
Oni\_foxl2l HPPVLVPHNGYPYGGVTQPMSP-----DG--GTVSVACS-----YQQFTSYGRPADP-ALAYLMDQ  
Opu\_foxl2l HPTVLVPHNGCPYGGVTQPMSP-----DG--GTVSVACS-----YPQFTSYARQTEA-PLAHSFDL  
Gac\_foxl2l HPAVLVPHNACPYGAERPPGSP-----GG--GTAPVACN-----YQQVSGYARHAEH-LRVYSYDQ  
Ola\_foxl2l HPSVLVPHNGWPYGGVTQPMCP-----DG--GSAAVACG-----YQQLAPYGRQTESPALGFQSDP  
Gmo\_foxl2l HPPVLVPHGGCPYGGLAQPLTP-----DG--GSVSLASY-----YV-----  
Omy\_foxl2l HASVVMPHNGCPCGGMTQPLSP-----GG--GSTSQAC-----YPQFS-FAIQPEM-PLAHSFE-
