# Supplementary figures and images for: Comparative Studies on Duplicated foxl2 Paralogs in Spotted Knifejaw Oplegnathus punctatus Show Functional Diversification
Source: MDPI journal article supplement (doi:10.3390/genes14101847), 2023-09-23

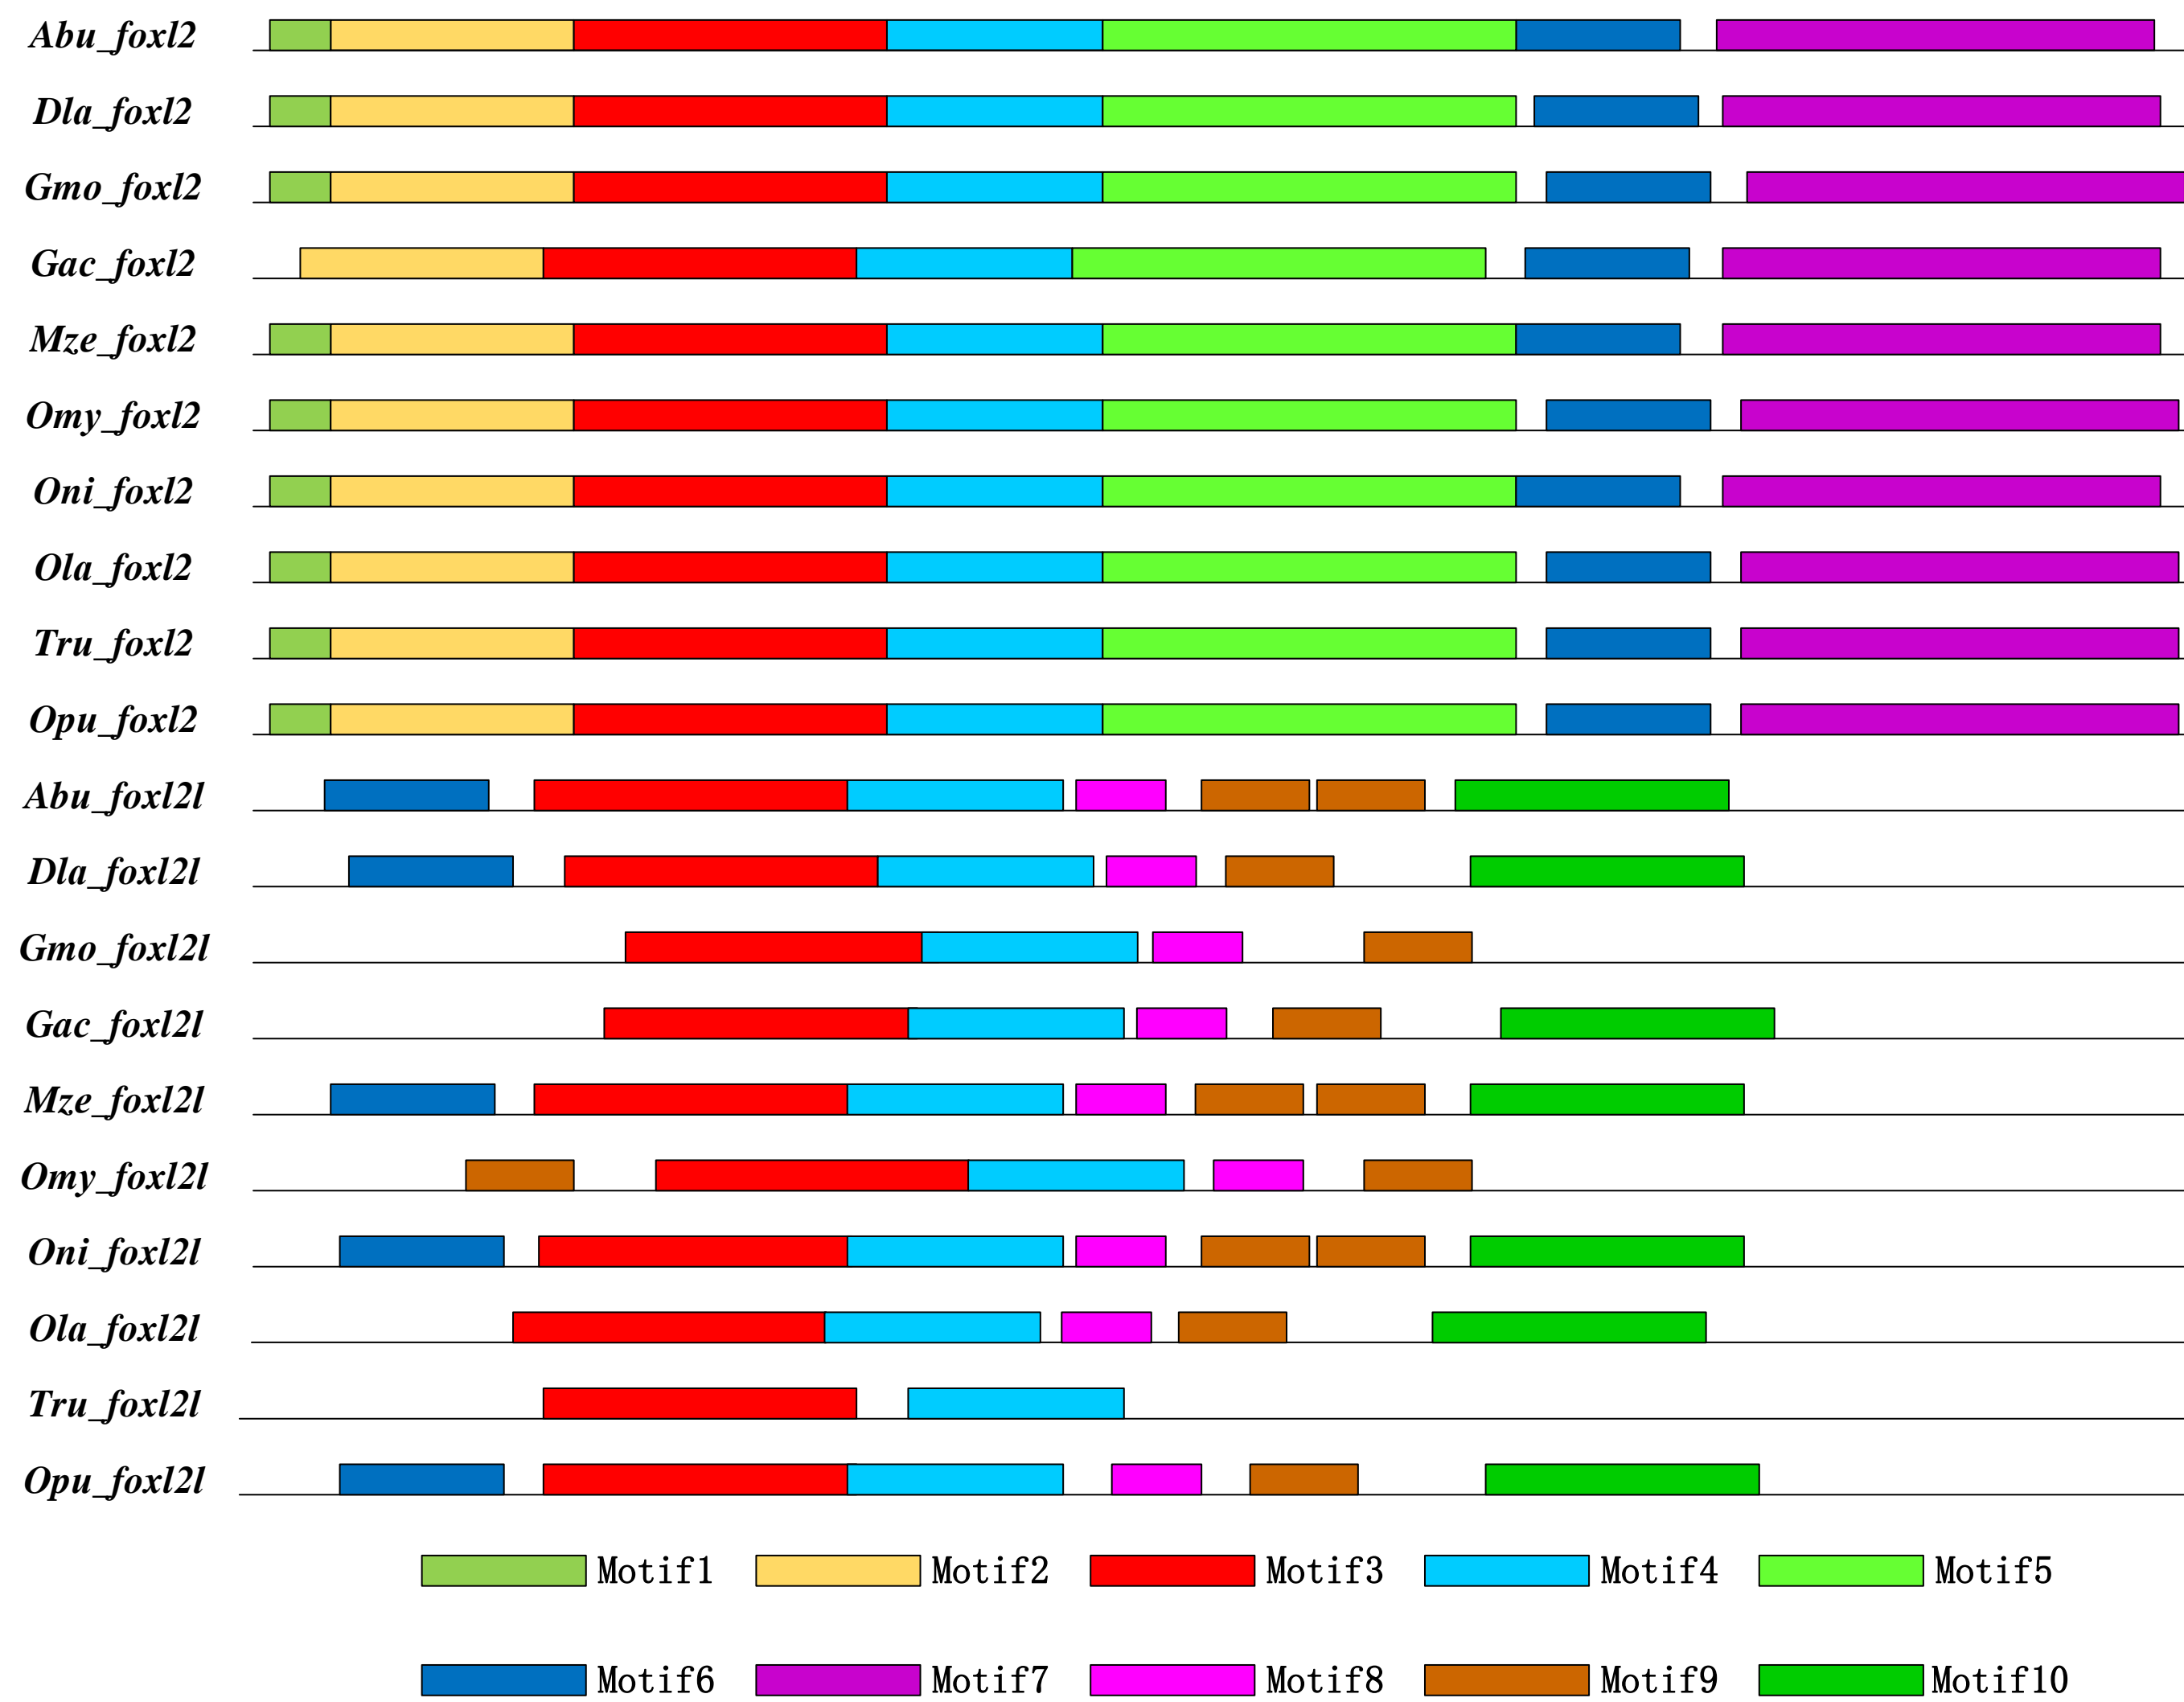

Supplement: s1 [file s1]

**A**

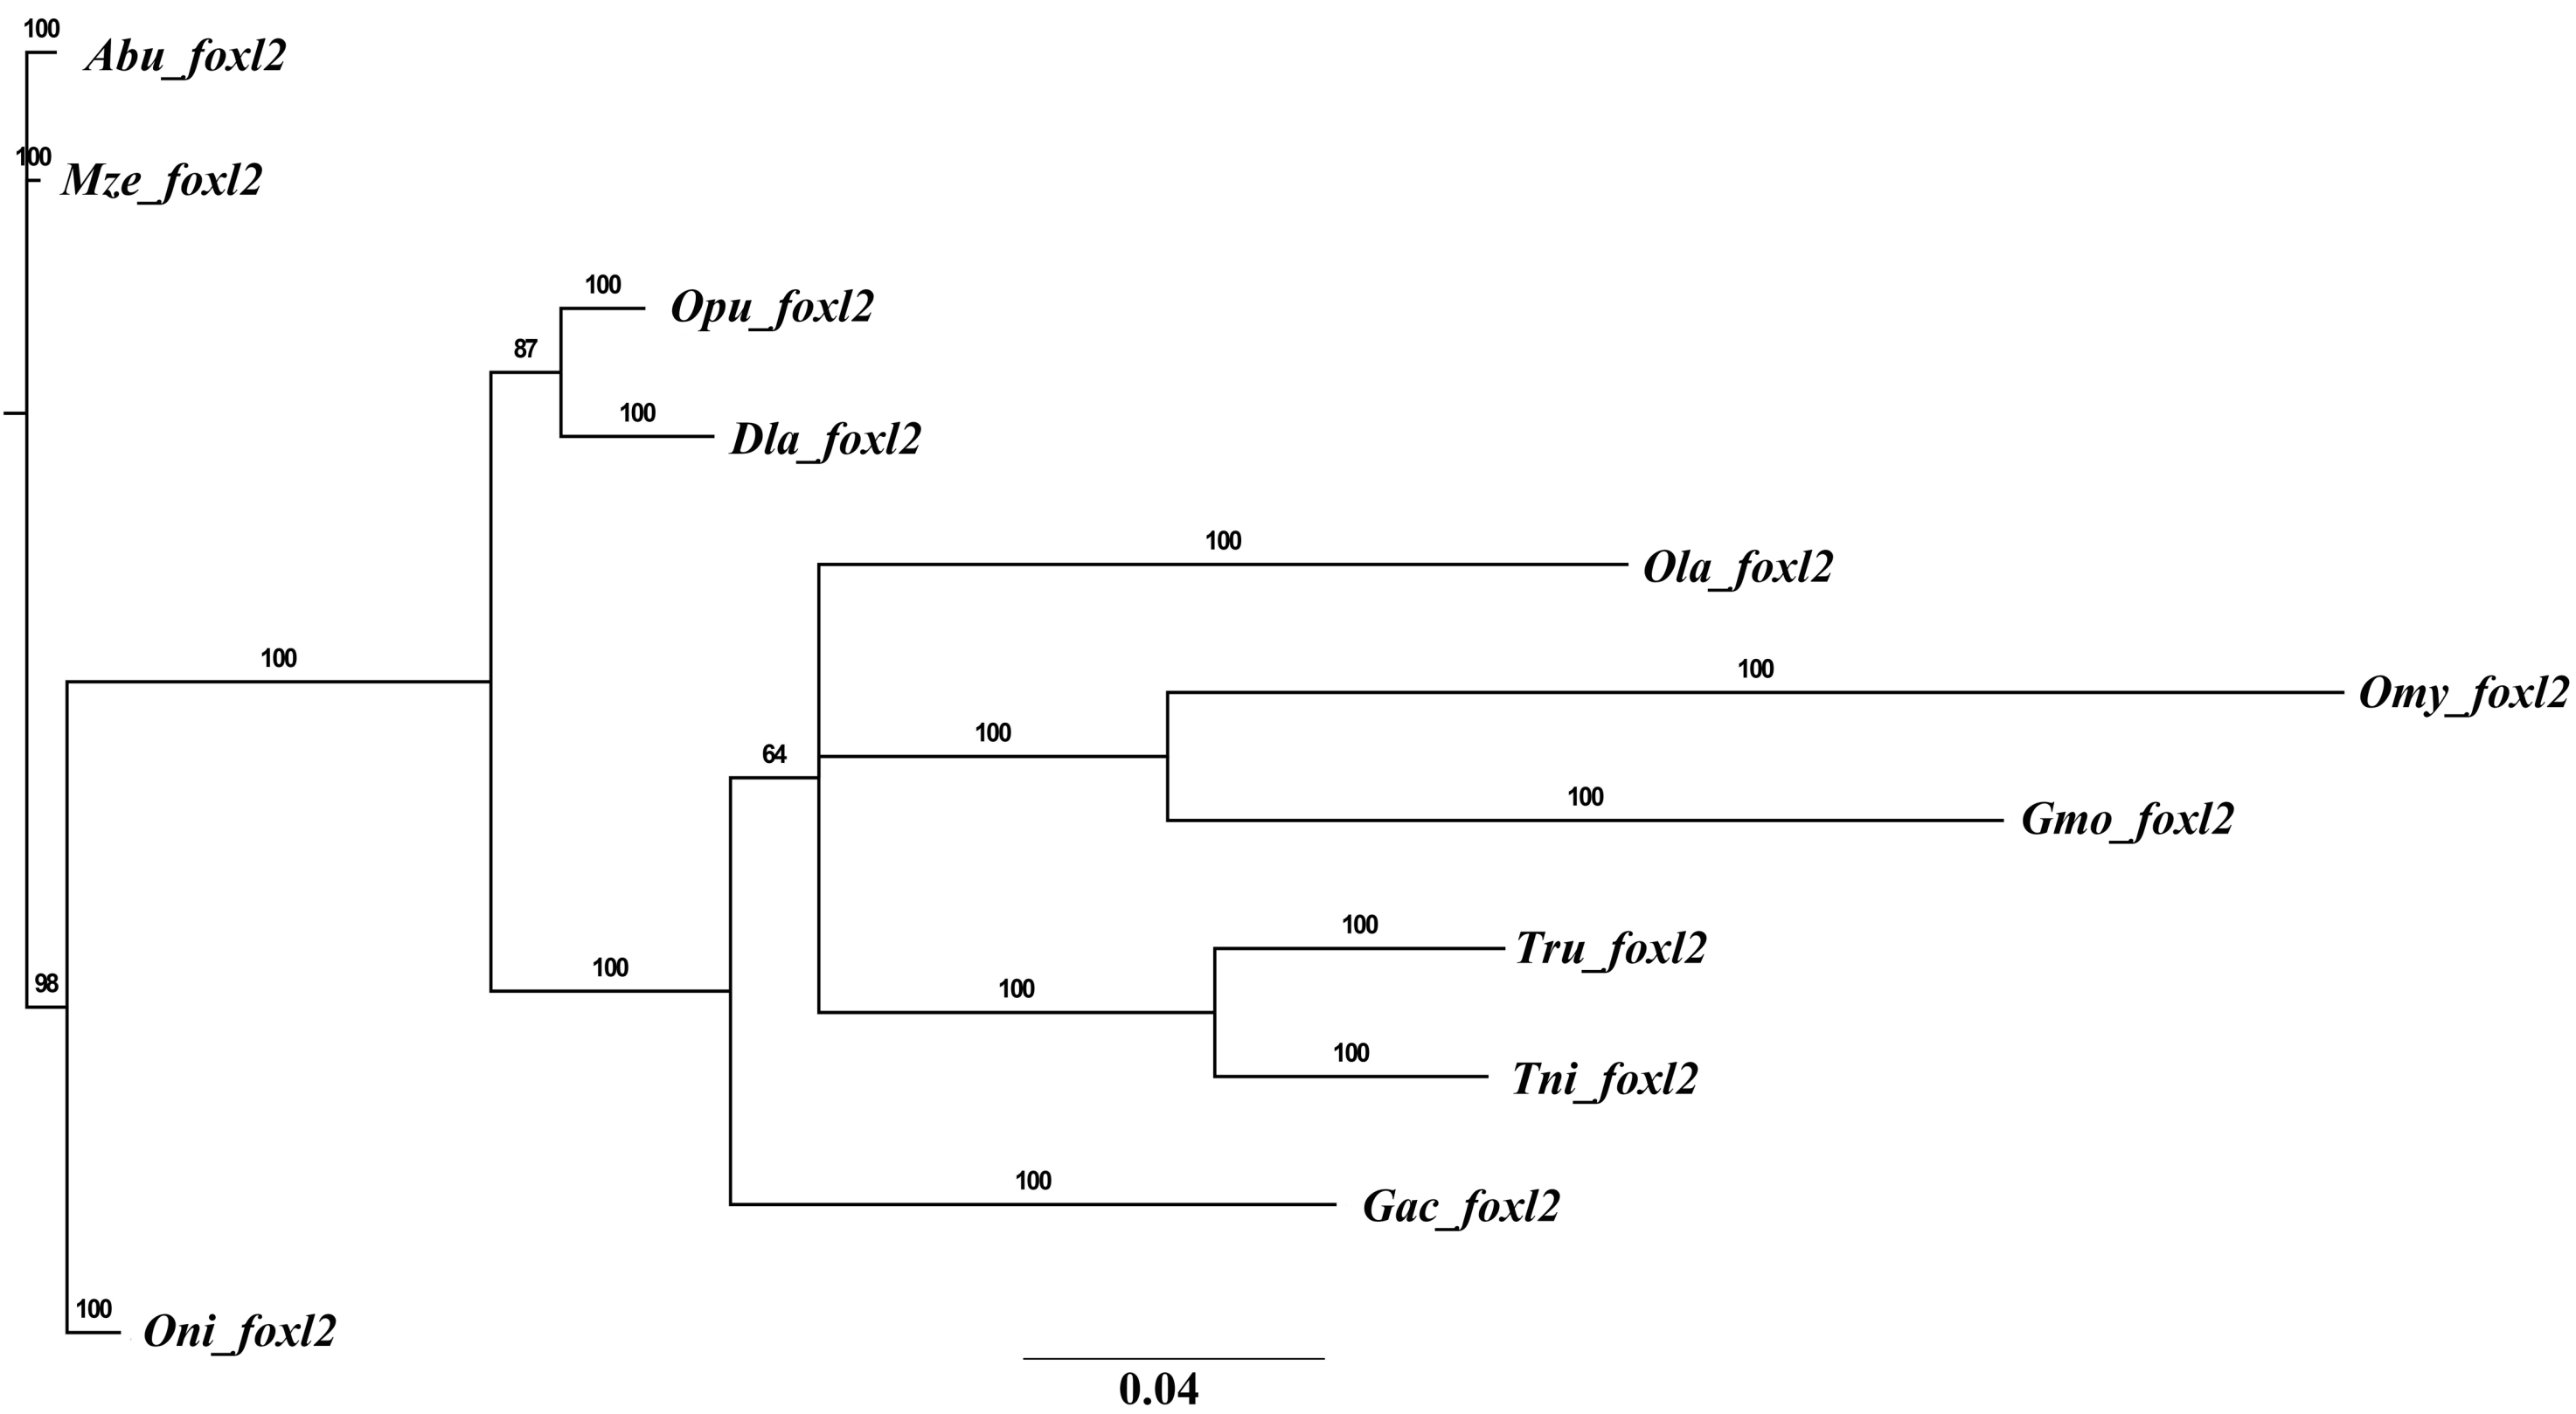

**B**

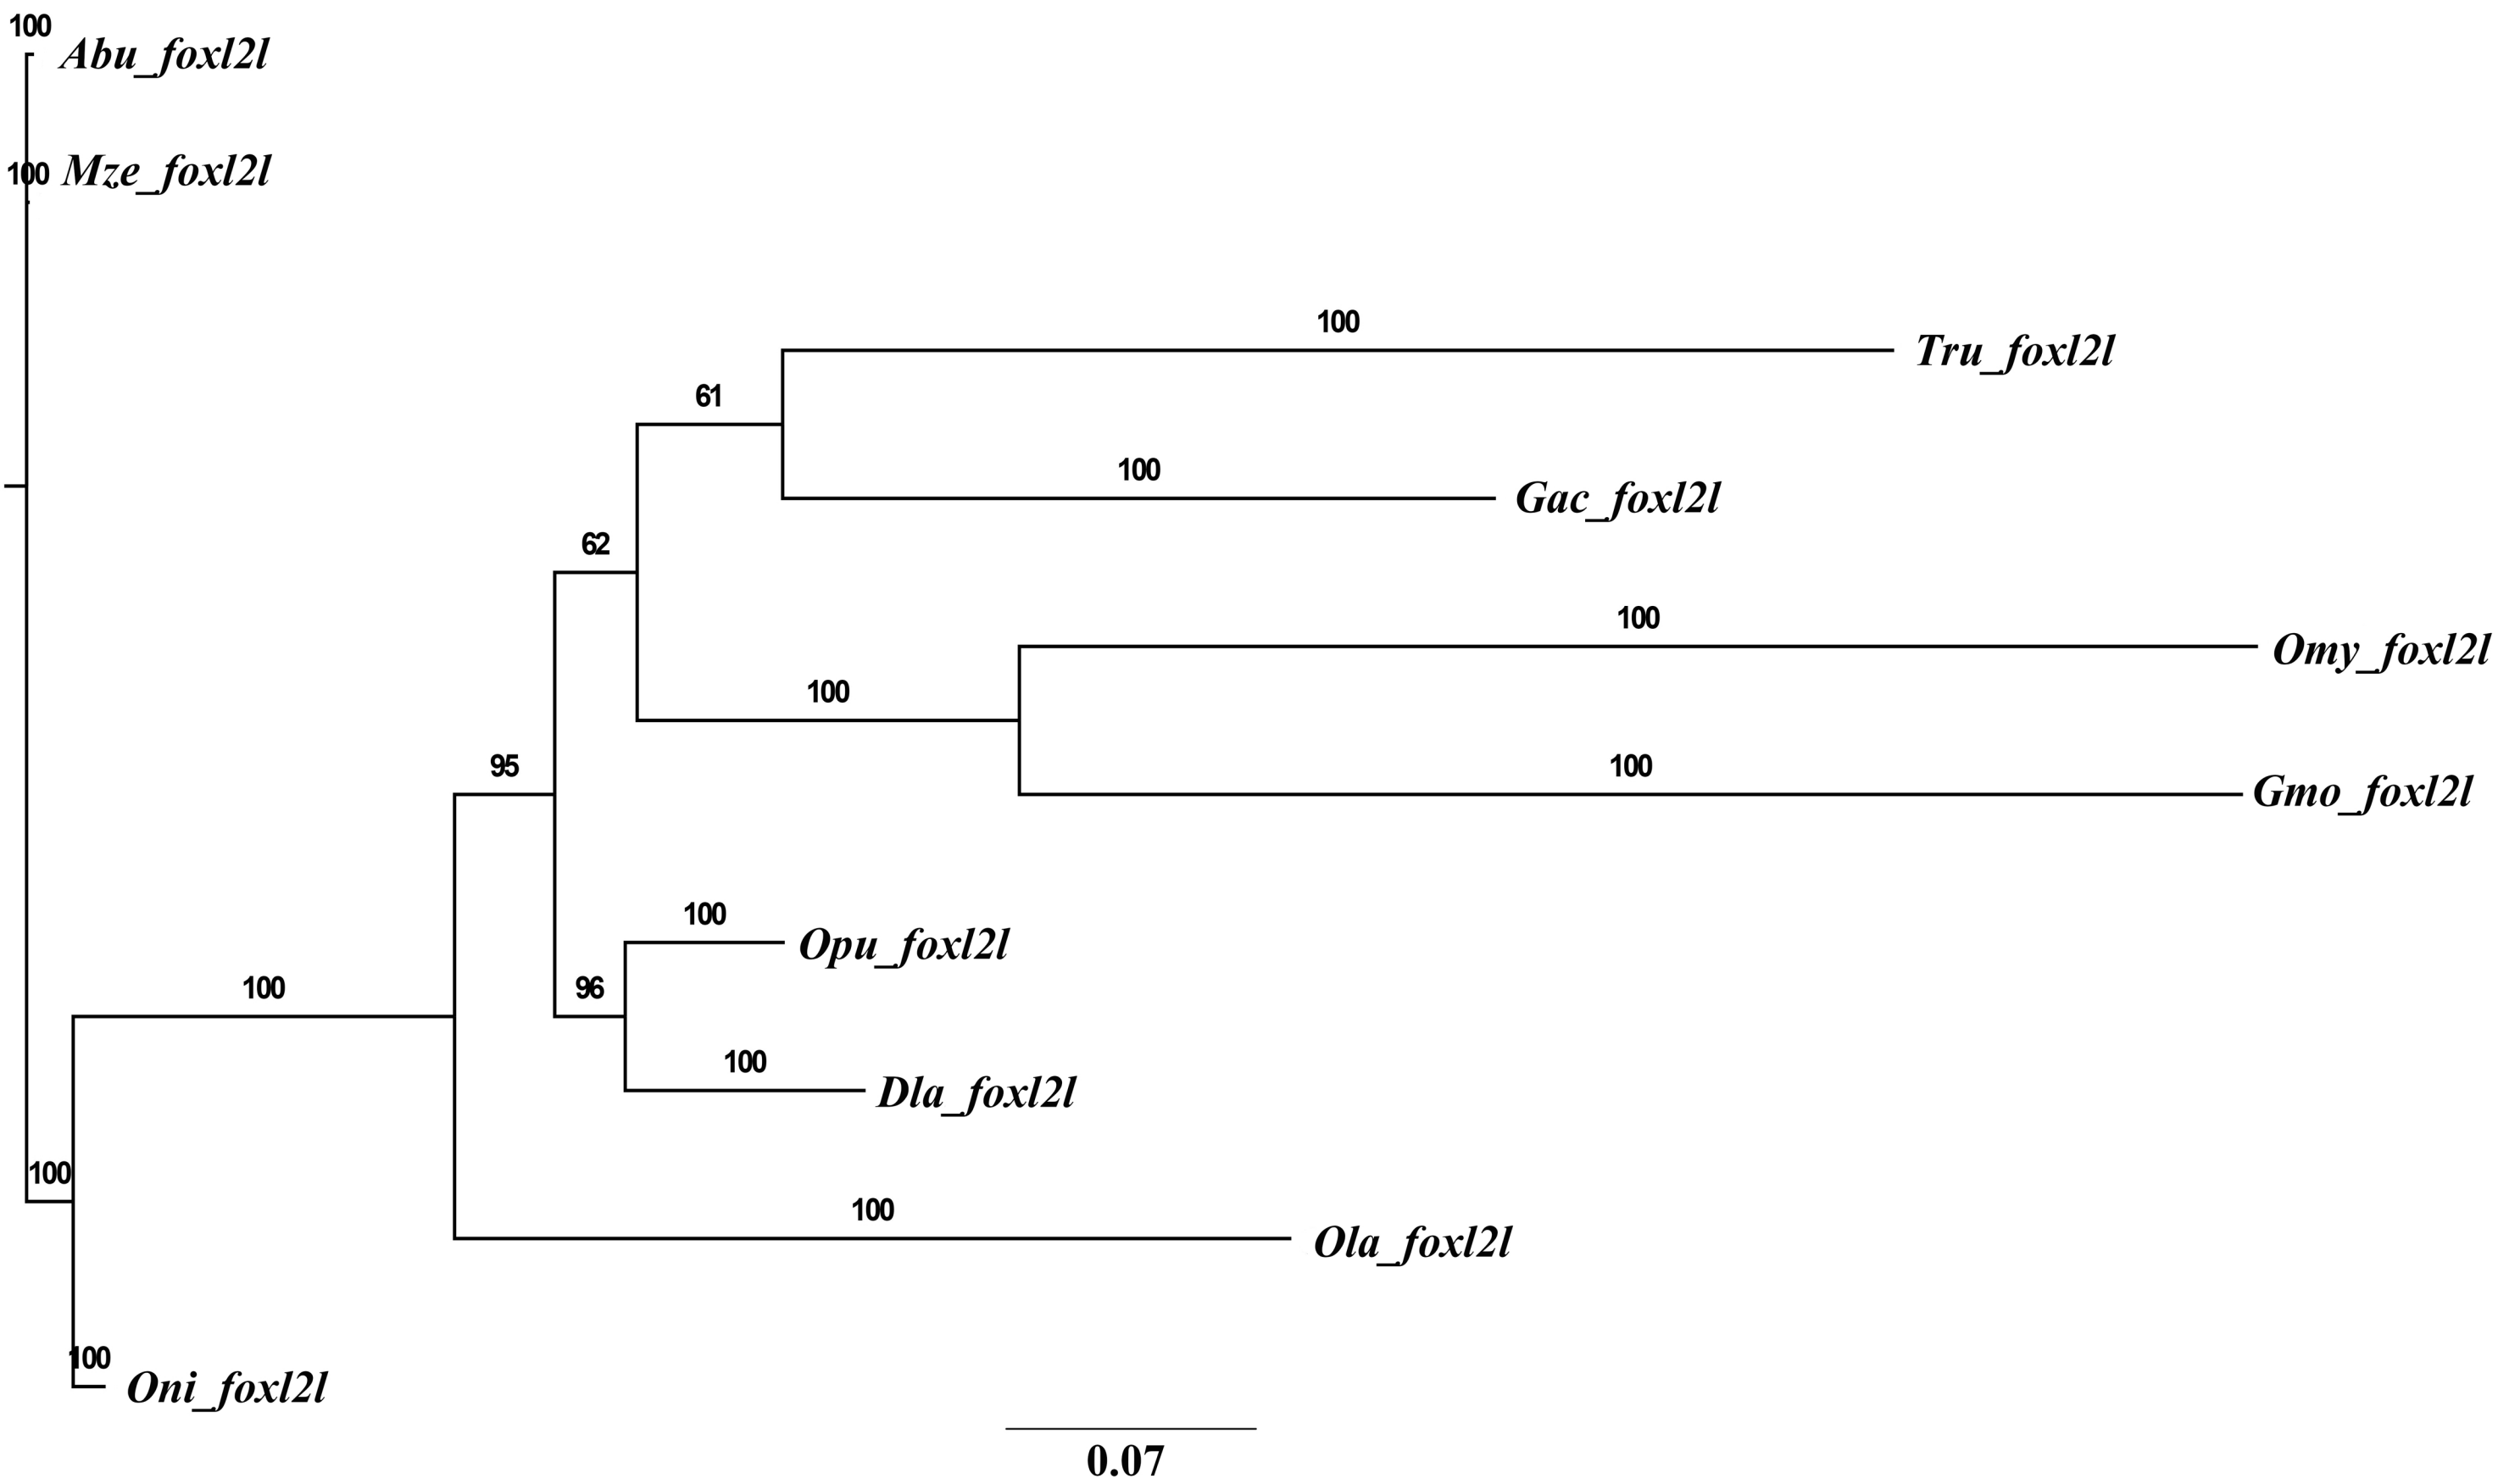

Supplement: s1 [file s1]
